# Supplementary material for: In vivo mitochondrial base editing via adeno-associated viral delivery to mouse post-mitotic tissue
Source: PubMed Central journal article supplement (PMC8825850; doi:10.1038/s41467-022-28358-w), 2022-02-08
Supplement: 41467_2022_28358_MOESM1_ESM.pdf [file 41467_2022_28358_MOESM1_ESM.pdf]

## Supplementary Information

### ***In vivo* mitochondrial base editing via adeno-associated viral delivery to mouse post-mitotic tissue**

**Pedro Silva-Pinheiro<sup>1</sup>, Pavel A. Nash<sup>1</sup>, Lindsey Van Haute<sup>1</sup>, Christian D. Mutti<sup>1</sup>, Keira Turner<sup>1</sup> and Michal Minczuk<sup>1\*</sup>**

<sup>1</sup> MRC Mitochondrial Biology Unit, University of Cambridge, Cambridge, UK

\*Corresponding author:

Tel: +44 1223 252750; E-mail: [michal.minczuk@mrc-mbu.cam.ac.uk](mailto:michal.minczuk@mrc-mbu.cam.ac.uk)

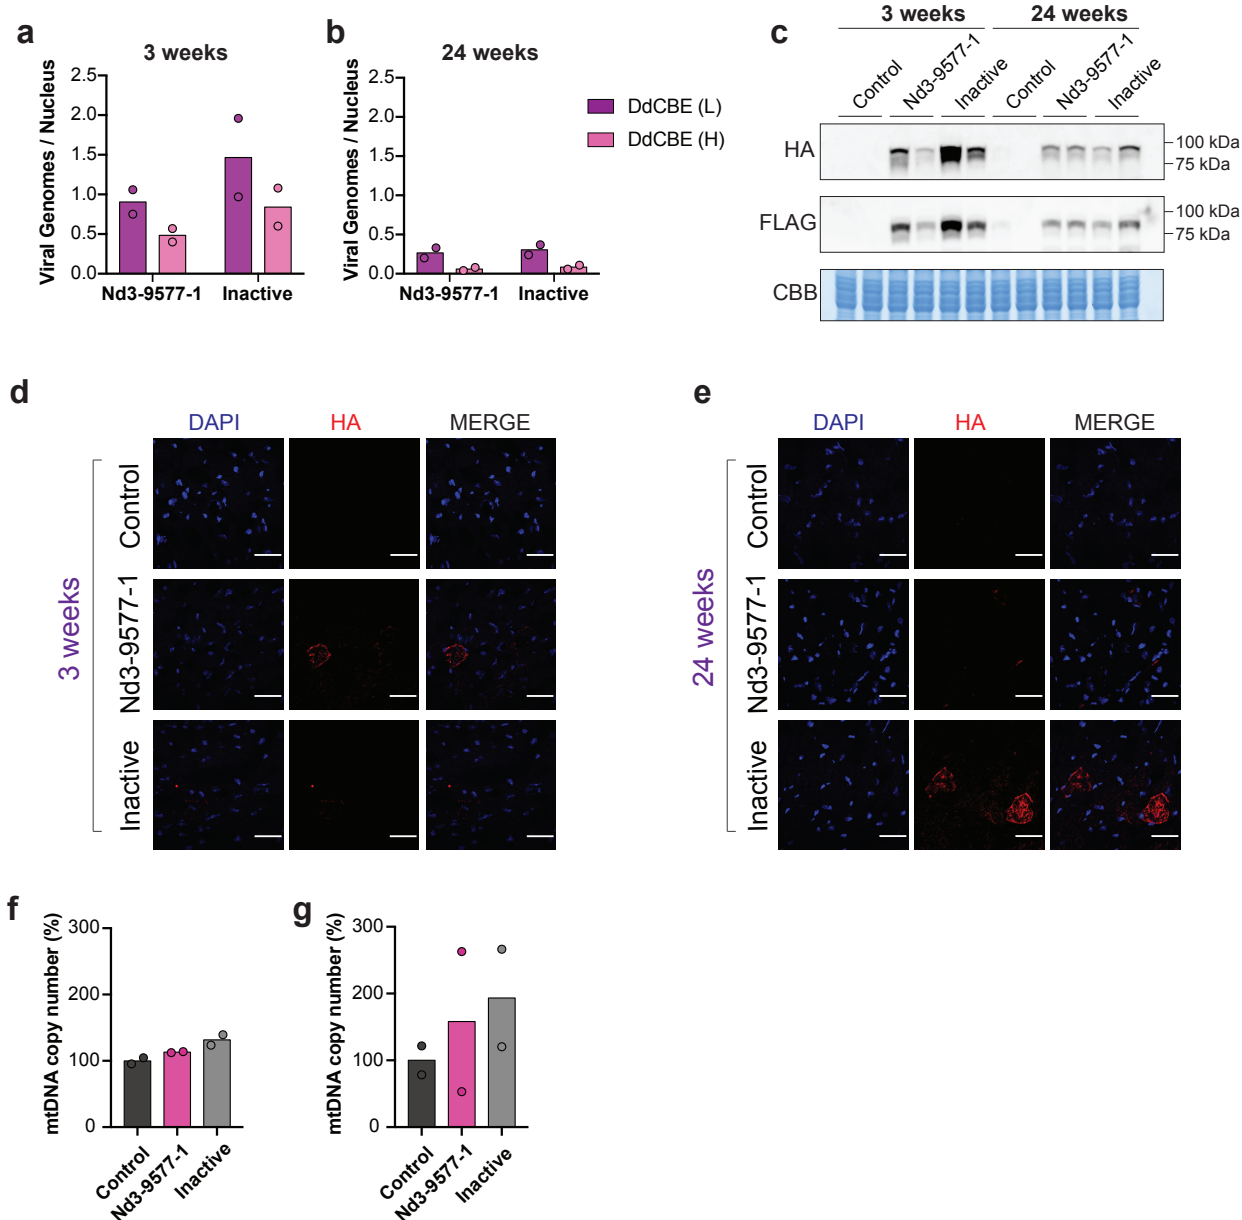

**Supplementary Fig. 1 | Characterization of mouse hearts upon adult-delivery of AAV-DdCBEs.**

**a,b.** Real-Time qPCR quantification of AAV-DdCBE (L) and AAV-DdCBE (H) viral genomes per nucleus in hearts of adult-injected mice at 3 weeks (a) or 24 weeks (b) post-injection of either the catalytically active or inactive DdCBE-Nd3-9577-1 AAV pair. Bars represent the mean (n=2). Source data are provided as a Source Data file. **c.** Western blot analysis of the levels of HA-tagged DdCBE (L) and Flag-tagged DdCBE (H) in hearts of adult-injected mice at 3 weeks or 24 weeks post-injection of either the catalytically active or inactive DdCBE-Nd3-9577-1 AAV pair and vehicle injected mice (control). Coomassie Brilliant Blue (CBB) was used as loading control. Images representative of n=2 independent biological replicates. Each lane represents a sample from an individual mouse. **d,e.** Immunohistochemistry analysis of the HA-tagged DdCBE (L) in hearts of adult-injected mice at 3 weeks (d) or 24 weeks (e) post-injection of either the catalytically active or inactive DdCBE-Nd3-9577-1 AAV pair and vehicle injected mice (control). Scale bars: 30  $\mu$ m. **f,g.** Real-Time qPCR relative quantification of mtDNA copy number in hearts of adult-injected mice at 3 weeks (f) or 24 weeks (g) post-injection of either the catalytically active or inactive DdCBE-Nd3-9577-1 AAV pair. Bars represent the mean (n=2). Source data are provided as a Source Data file.

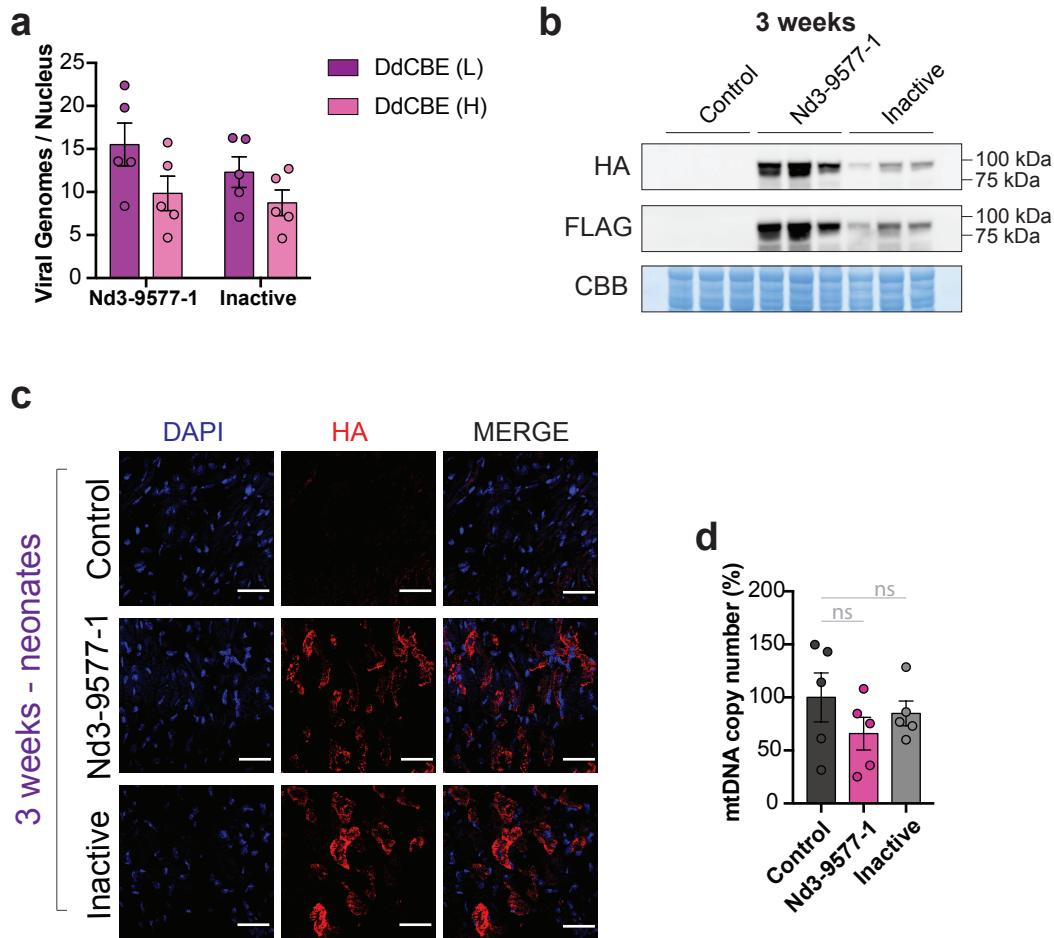

**Supplementary Fig. 2 | Characterization of mouse hearts upon neonatal-delivery of AAV-DdCBEs.**

**a.** Real-Time qPCR quantification of AAV-DdCBE (L) and AAV-DdCBE (H) viral genomes per nucleus in hearts of neonate-injected mice at 3 weeks post-injection of either the catalytically active or inactive DdCBE-Nd3-9577-1 AAV pair. Bars represent the mean and error bars represent  $\pm$  SEM ( $n = 5$ ). Source data are provided as a Source Data file. **b.** Western blot analysis of the levels of HA-tagged DdCBE (L) and Flag-tagged DdCBE (H) in hearts of neonate-injected mice at 3 weeks post-injection of either the catalytically active or inactive DdCBE-Nd3-9577-1 AAV pair and vehicle injected mice (control). Coomassie Brilliant Blue (CBB) was used as loading control. Images representative of  $n=3$  independent biological replicates. **c.** Immunohistochemistry analysis of the HA-tagged DdCBE (L) in hearts neonate-injected mice at 3 weeks post-injection of either the catalytically active or inactive DdCBE-Nd3-9577-1 AAV pair and vehicle injected mice (control). Scale bars: 30  $\mu$ m. **d.** Real-Time qPCR relative quantification of mtDNA copy number in hearts of neonate-injected mice at 3 weeks post-injection of either the catalytically active or inactive DdCBE-Nd3-9577-1 AAV pair. Bars represent the mean and error bars represent  $\pm$  SEM ( $n = 5$ ). Ordinary one-way ANOVA with Dunnett's test: not significant - ns (Control vs Nd3-9577,  $P$ -value = 0.3142; Control vs Inactive,  $P$ -value = 0.7703). Source data are provided as a Source Data file.

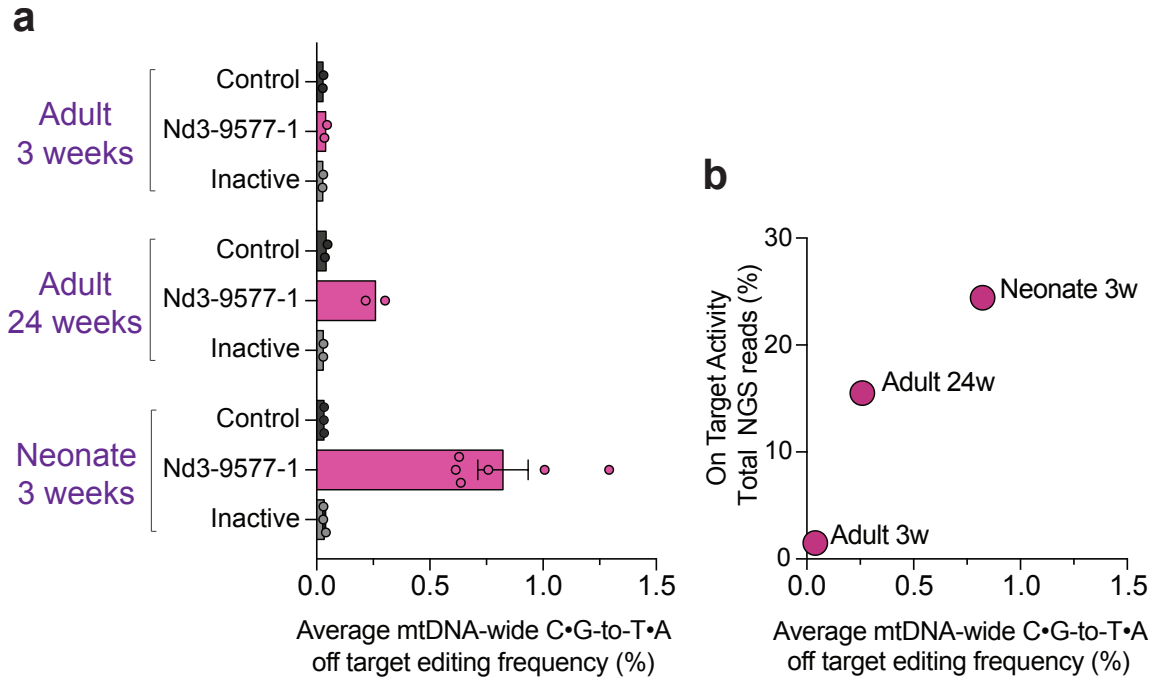

**Supplementary Fig. 3 | Assessment of mtDNA-wide off-target activity *in vivo* upon delivery of AAV-DdCBEs.**

**a.** NGS analysis of the average mtDNA-wide C·G to T·A off-target editing frequency by AAV-DdCBEs in adult mouse heart at 3 weeks or 24 weeks post-injection and in neonatal mouse hearts at 3 weeks post-injection. Each mouse was injected with either the catalytically active or inactive DdCBE-Nd3-9577-1 AAV pair or vehicle (control). Bars represent the mean and error bars represent  $\pm$  SEM ( $n=2$  for all experiments in adults;  $n=3$  for vehicle and inactive base editor controls in neonates;  $n=6$  for neonates injected with DdCBE-Nd3-9577-1 AAV). Source data are provided as a Source Data file. **b.** Correlation between on-target activity and average mtDNA-wide C·G to T·A off-target editing frequency by the catalytically active DdCBE-Nd3-9577-1 AAV pair in adult mouse heart at 3 weeks or 24 weeks post-injection and in neonatal mouse hearts at 3 weeks post-injection. Source data are provided as a Source Data file.

**a** MT-*Nd3* on-target:

L-strand 5' **TCAGAAAAAGCAAATC**CATAT**G AATGCG G ATTC<sub>1</sub>G** ACCCTACAAGCTCTGCA  
H-strand 3' AGTCTTTTTTCGTTTAGGTATAC<sub>6</sub>TTACGC<sub>12</sub>C<sub>13</sub>TAAG C<sub>18</sub>TGGGATGTTTCGAGACGT

Nuclear MT-*Nd3* pseudogene chromosome 1 (NUMT-Ch1):

Locus Ident. [%] **TCAGAAAAAGCAAATC**CATAT**G AATGCG G ATTC<sub>1</sub>G** ACCCTACAAGCTCTGCA  
Ch. 1 100 AGTCTTTTTTCGTTTAGGTATAC<sub>6</sub>TTACGC<sub>12</sub>C<sub>13</sub>TAAG C<sub>18</sub>TGGGATGTTTCGAGACGT

Nuclear MT-*Nd3* pseudogene chromosome 14 (NUMT-Ch14):

Locus Ident. [%] **TCAGAAAAAGCAAATC**CATAT**G AATGCA C GTTT G** ACCCCACAAGCTCCGTA  
Ch. 14 86 AGTCTTTTTTCGTTTAGGTATAC<sub>6</sub>TTACGT G TAAA C<sub>18</sub>TGGGGTGTTCGAGGCAT

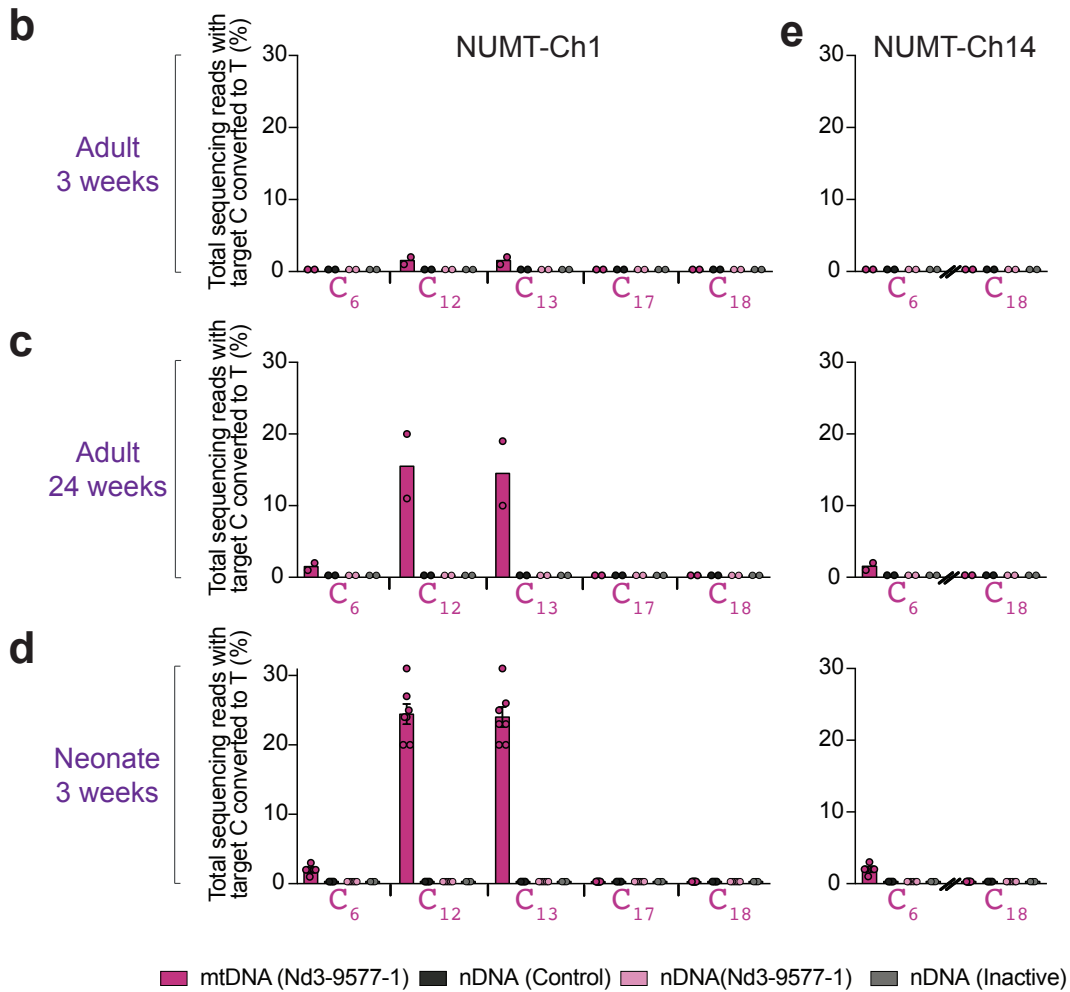

**Supplementary Fig. 4 | Assessment of nuclear DNA off-target activity *in vivo* upon delivery of AAV-DdCBEs.**

**a.** Schematic of the DdCBE-Nd3-9577-1 on-target region within the *MT-Nd3* gene and related regions in nuclear DNA bearing greatest homology: nuclear MT-*Nd3* pseudogene located on chromosome 1 (NUMT-Ch1) and nuclear MT-*Nd3* pseudogene located on chromosome 14 (NUMT-Ch14). Locus and percentage of sequence identity with the canonical site in mtDNA (Ident.) are shown for each nuclear pseudogene. TALE binding sites are presented in blue and targeted Cs are shown in pink. Bases in red indicate divergence from the target sequence. Arrows indicate the mtDNA targeted Cs conserved in the nuclear pseudogenes. **b,c,d.** NGS analysis of nuclear DNA off-target editing frequency of Cs within the nuclear MT-*Nd3* pseudogene 1 (NUMT-Ch1) by AAV-DdCBEs in adult mouse heart at 3 weeks (b) or

24 weeks (c) post-injection and in neonatal mouse hearts at 3 weeks (d) post-injection. Each mouse was injected with either the catalytically active or inactive DdCBE-Nd3-9577-1 AAV pair or vehicle (control). The on-target mtDNA editing frequency is shown for each C for comparison. Bars represent the mean and error bars represent  $\pm$  SEM (n=2 for all experiments in adults; n=3 for vehicle and inactive base editor controls in neonates; n=6 for neonates injected with DdCBE-Nd3-9577-1 AAV). Source data are provided as a Source Data file. **e,f,g.** NGS analysis of nuclear DNA off-target editing frequency of Cs within the nuclear MT-Nd3 pseudogene 2 (NUMT-Ch14) by AAV-DdCBEs in adult mouse heart at 3 weeks (e) or 24 weeks (f) post-injection and in neonatal mouse hearts at 3 weeks (g) post-injection. Each mouse was injected with either the catalytically active or inactive DdCBE-Nd3-9577-1 AAV pair or vehicle (control). The on-target mtDNA editing frequency is shown for each C for comparison. Bars represent the mean and error bars represent  $\pm$  SEM (n=2 for all experiments in adults; n=3 for vehicle and inactive base editor controls in neonates; n=6 for neonates injected with DdCBE-Nd3-9577-1 AAV). Source data are provided as a Source Data file.

## Supplementary Sequences 1 | Amino acid sequences of DdCBEs-Nd3-9577 used in the cell screen.

The halves used to target the L-strand - **DdCBE (L)** – in the cell screen have the general architecture of (from N- to C-terminus):

**SOD2 MTS** – **3xHA** – **TALE** – 2aa linker – **DddA<sub>tox</sub> split** – 4aa linker – **UGI** – **T2A** – **GFP\***

**Targeting: 5´-TCAGAAAAAGCAAATC-3´**

**DdCBE (L) - Nd3-9577 - G1333-N:**

MLSRVCGTSRQLAPVLGGLGSRQKHSLPAGYYPYDVPDYAGYYPYDVPDYAGYYPYDVPDY  
AIHGVPMDLRTLGLYSQQQKEKIKPKVRSVAQHHEALVGHGFTHAHIVALSQHPAALGTV  
AVKYQDMIAALPEATHEAIVGVGKQWSGARALEALLTVAGELRGPPGTLDTGQLLKIAKRG  
GVTAVEAVHAWRNALTGAPLNLTPQVVAIASHDGGKQALETVQRLLPVLCQAHGLTPAQ  
VVAIASNIGGKQALETVQRLLPVLCQAHGLTPDQVVAIASNNGGKQALETVQRLLPVLCQAH  
GLTPEQVVAIASNIGGKQALETVQRLLPVLCQAHGLTPDQVVAIASNIGGKQALETVQRLLP  
VLCQAHGLTPDQVVAIASNIGGKQALETVQRLLPVLCQAHGLTPDQVVAIASNIGGKQALET  
VQRLLPVLCQAHGLTPDQVVAIASNIGGKQALETVQRLLPVLCQAHGLTPDQVVAIASNNG  
GKQALETVQRLLPVLCQAHGLTPEQVVAIASHDGGKQALETVQRLLPVLCQAHGLTPAQVV  
AIASNIGGKQALETVQRLLPVLCQAHGLTPDQVVAIASNIGGKQALETVQRLLPVLCQAHGL  
TPDQVVAIASNIGGKQALETVQRLLPVLCQAHGLTPDQVVAIASNNGGKQALETVQRLLPV  
CQAHGLTPEQVVAIASHDGGRPALESIVAQLSRPDPALAALTNDHLVALACLGGRPALDAV  
KKGLPHAPALIKRTNRRIPERTSHRVAGSGSYALGPYQISAPQLPAYNGQTVGTFYYVND  
AGLESKVFSSGSSGSGSTNLSDIIEKETGKQLVIQESILMLPEEVEEVIGNKPESDILVHTAYD  
ESTDENVMILLTSDAPEYKPWALVIQDSNGENKIKMLRSGSGEGRGSLTTCGDVEEN/T2A\_c  
leavage\_site/PGPRLEMVSKGEELFTGVVPIVELDGDVNGHKFSVSGEGEGDATYGLTLK  
FICTTGKLPVPWPTLVTTLTGQVCFSRYPDHMKQHDFFKSAMPEGYVQERTIFFKDDGNY  
KTRAEVKFEGDTLVNRIELKIDFKEDGNILGHKLEYNYNSHNVYIMADKQKNGIKVNFKIRH  
NIEDGSVQLADHYQQNTPIGDGPVLLPDNHYLSTQSALS KDPNEKRDHMLLEFVTAAGITL  
GMDELYK\*

**DdCBE (L) - Nd3-9577 - G1333-C:**

MLSRVCGTSRQLAPVLGGLGSRQKHSLPAGYYPYDVPDYAGYYPYDVPDYAGYYPYDVPDY  
AIHGVPMDLRTLGLYSQQQKEKIKPKVRSVAQHHEALVGHGFTHAHIVALSQHPAALGTV  
AVKYQDMIAALPEATHEAIVGVGKQWSGARALEALLTVAGELRGPPGTLDTGQLLKIAKRG  
GVTAVEAVHAWRNALTGAPLNLTPQVVAIASHDGGKQALETVQRLLPVLCQAHGLTPAQ  
VVAIASNIGGKQALETVQRLLPVLCQAHGLTPDQVVAIASNNGGKQALETVQRLLPVLCQAH  
GLTPEQVVAIASNIGGKQALETVQRLLPVLCQAHGLTPDQVVAIASNIGGKQALETVQRLLP  
VLCQAHGLTPDQVVAIASNIGGKQALETVQRLLPVLCQAHGLTPDQVVAIASNIGGKQALET  
VQRLLPVLCQAHGLTPDQVVAIASNIGGKQALETVQRLLPVLCQAHGLTPDQVVAIASNNG  
GKQALETVQRLLPVLCQAHGLTPEQVVAIASHDGGKQALETVQRLLPVLCQAHGLTPAQVV  
AIASNIGGKQALETVQRLLPVLCQAHGLTPDQVVAIASNIGGKQALETVQRLLPVLCQAHGL  
TPDQVVAIASNIGGKQALETVQRLLPVLCQAHGLTPDQVVAIASNNGGKQALETVQRLLPV  
CQAHGLTPEQVVAIASHDGGRPALESIVAQLSRPDPALAALTNDHLVALACLGGRPALDAV  
KKGLPHAPALIKRTNRRIPERTSHRVAGSPTYPNYANAGHVEGQSALFMRDNGISEGLV  
HNNPEGTCGFCVNMETLLPENAKMTVVPPEGAIPVKRGATGETKVFTGNSNSPKSPTKG  
GCSGSGSTNLSDIIEKETGKQLVIQESILMLPEEVEEVIGNKPESDILVHTAYDESTDENVMILL  
TSDAPEYKPWALVIQDSNGENKIKMLRSGSGEGRGSLTTCGDVEEN/T2A\_cleavage\_site/PG

PRLEMVSKGEELFTGVVPILVELDGDVNGHKFSVSGEGEGDATYGKLTCLKFICTTGKLPVP  
WPTLVTTLTYGVCFSRYPDHMKQHDFFKSAMPEGYVQERTIFFKDDGNYKTRAEVKFEG  
DTLVNRIELKGIDFKEDGNILGHKLEYNYNSHNVYIMADKQKNGIKVNFKIRHNIEDGSVQLA  
DHYQQNTPIGDGPVLLPDNHYLSTQSALSKDPNEKRDHMLLEFVTAAGITLGMDELYK\*

**DdCBE (L) - Nd3-9577 - G1337-N:**

MLSRVAVCGTSRQLAPVLGGLSRQKHSLPAGYPPYDVPDYAGYPPYDVPDYAGYPPYDVPDY  
AIHGVPMDLRTLGLYSQQQEQEKIKPKVRSVAQHHEALVGHGFTHAHIVALSQHPAALGTV  
AVKYQDMIAALPEATHEAIVGVGKQWVGARALEALLTVAGELRGPPGTLDTGQLLKIARG  
GVTAVEAVHAWRNALTGAPLNLTPQVVAIASHDGGKQALETVQRLLPVLCQAHGLTPAQ  
VVAIASNIGGKQALETVQRLLPVLCQAHGLTPDQVVAIASNNGGKQALETVQRLLPVLCQAH  
GLTPEQVVAIASNIGGKQALETVQRLLPVLCQAHGLTPDQVVAIASNIGGKQALETVQRLLP  
VLCQAHGLTPDQVVAIASNIGGKQALETVQRLLPVLCQAHGLTPDQVVAIASNIGGKQALET  
VQRLLPVLCQAHGLTPDQVVAIASNIGGKQALETVQRLLPVLCQAHGLTPDQVVAIASNNG  
GKQALETVQRLLPVLCQAHGLTPEQVVAIASHDGGKQALETVQRLLPVLCQAHGLTPAQV  
AIASNIGGKQALETVQRLLPVLCQAHGLTPDQVVAIASNIGGKQALETVQRLLPVLCQAHGL  
TPDQVVAIASNIGGKQALETVQRLLPVLCQAHGLTPDQVVAIASNNGGKQALETVQRLLPV  
CQAHGLTPEQVVAIASHDGGRPALLESIVAQLSRPDPALAALTNDHLVALACLGGPALDAV  
KKGLPHAPALIKRTNRRIPERTSHRVAGSGSYALGPYQISAPQLPAYNGQTVGTFYVYVND  
GGLESKVFSSGGPTYPNYANAGHVEGQSALFMRDNGISEGLVFHNNPEGTCGFCVNMT  
ETLLPENAKMTVVPPEGSGGS TNLSDIIEKETGKQLVIQESILMLPEEVEEVIGNKPESDILVH  
TAYDESTDENVMMLTSDAPEYKPWALVIQDSNGENKIKMLRSGSGEGRGSLTTCGDVEEN/  
T2A\_cleavage\_site/PGPRLEMVSKGEELFTGVVPILVELDGDVNGHKFSVSGEGEGDATYG  
KLTCLKFICTTGKLPVPWPTLVTTLTYGVCFSRYPDHMKQHDFFKSAMPEGYVQERTIFFK  
DDGNYKTRAEVKFEGDTLVNRIELKGIDFKEDGNILGHKLEYNYNSHNVYIMADKQKNGIKV  
NFKIRHNIEDGSVQLADHYQQNTPIGDGPVLLPDNHYLSTQSALSKDPNEKRDHMLLEFV  
TAAGITLGMDELYK\*

**DdCBE (L) - Nd3-9577 - G1337-C:**

MLSRVAVCGTSRQLAPVLGGLSRQKHSLPAGYPPYDVPDYAGYPPYDVPDYAGYPPYDVPDY  
AIHGVPMDLRTLGLYSQQQEQEKIKPKVRSVAQHHEALVGHGFTHAHIVALSQHPAALGTV  
AVKYQDMIAALPEATHEAIVGVGKQWVGARALEALLTVAGELRGPPGTLDTGQLLKIARG  
GVTAVEAVHAWRNALTGAPLNLTPQVVAIASHDGGKQALETVQRLLPVLCQAHGLTPAQ  
VVAIASNIGGKQALETVQRLLPVLCQAHGLTPDQVVAIASNNGGKQALETVQRLLPVLCQAH  
GLTPEQVVAIASNIGGKQALETVQRLLPVLCQAHGLTPDQVVAIASNIGGKQALETVQRLLP  
VLCQAHGLTPDQVVAIASNIGGKQALETVQRLLPVLCQAHGLTPDQVVAIASNIGGKQALET  
VQRLLPVLCQAHGLTPDQVVAIASNIGGKQALETVQRLLPVLCQAHGLTPDQVVAIASNNG  
GKQALETVQRLLPVLCQAHGLTPEQVVAIASHDGGKQALETVQRLLPVLCQAHGLTPAQV  
AIASNIGGKQALETVQRLLPVLCQAHGLTPDQVVAIASNIGGKQALETVQRLLPVLCQAHGL  
TPDQVVAIASNIGGKQALETVQRLLPVLCQAHGLTPDQVVAIASNNGGKQALETVQRLLPV  
CQAHGLTPEQVVAIASHDGGRPALLESIVAQLSRPDPALAALTNDHLVALACLGGPALDAV  
KKGLPHAPALIKRTNRRIPERTSHRVAGSAIPVKRGATGETKVFTGNSNSPKSPTKGGCSG  
GSTNLSDIIEKETGKQLVIQESILMLPEEVEEVIGNKPESDILVHTAYDESTDENVMMLTSDAP  
EYKPWALVIQDSNGENKIKMLRSGSGEGRGSLTTCGDVEEN/T2A\_cleavage\_site/PGPRLE  
MVSKEELFTGVVPILVELDGDVNGHKFSVSGEGEGDATYGKLTCLKFICTTGKLPVPWPTL  
VTTLTYGVCFSRYPDHMKQHDFFKSAMPEGYVQERTIFFKDDGNYKTRAEVKFEGDTLV  
NRIELKGIDFKEDGNILGHKLEYNYNSHNVYIMADKQKNGIKVNFKIRHNIEDGSVQLADHYQ  
QNTPIGDGPVLLPDNHYLSTQSALSKDPNEKRDHMLLEFVTAAGITLGMDELYK\*



The halves used to target the H-strand - DdCBE (H) – in the cell screen have the general architecture of (from N- to C-terminus):

SOD2 MTS – 3xHA – TALE – 2aa linker – DddA<sub>tox</sub> split – 4aa linker – UGI – E2A – RFP\*

**Targeting: 5'-TGCAGAGCTTAGG-3'**

**DdCBE (H) - Nd3-9577 - G1333-N:**

MLSRVCGTSRQLAPVLGGLGSRQKHSLPAGYPYDVPDYAGYPYDVPDYAGYPYDVPDY  
AIHGVP MVDLRTLGYSSQQQEKIKPKV RSTVAQHHEALVGHGFTHAHIVALSQHPAALGTV  
AVKYQDMIAALPEATHEAIVGVGKQWSGARALEALLTVAGELRGPPGTLDTGQLLKIARKG  
GVTAVEAVHAWRNALTGAPLNLTP EQVVAIASNNGGKQALETVQRLLPVLCQAHGLTPEQ  
VVAIASHDGGKQALETVQRLLPVLCQAHGLTPAQVVAIASNIGGKQALETVQRLLPVLCQAH  
GLTPDQVVAIASNNGGKQALETVQRLLPVLCQAHGLTPEQVVAIASNIGGKQALETVQRLLP  
VLCQAHGLTPDQVVAIASNNGGKQALETVQRLLPVLCQAHGLTPEQVVAIASHDGGKQALE  
TVQRLLPVLCQAHGLTPAQVVAIASNIGGKQALETVQRLLPVLCQAHGLTPEQVVAIASNG  
GGKQALETVQRLLPVLCQAHGLTPEQVVAIASNNGGKQALETVQRLLPVLCQAHGLTPEQ  
VVAIASNNGGKQALETVQRLLPVLCQAHGLTPEQVVAIASNIGGKQALETVQRLLPVLCQAH  
GLTPDQVVAIASNNGGKQALETVQRLLPVLCQAHGLTPEQVVAIASNNGGKQALETVQRLL  
PVLCQAHGLTPEQVVAIASNNGRPALESIVAQLSRPDPALAALNDHLVALACLGGRPALD  
AVKKGLPHAPALIKRTNRRIPERTSHRVAGSGSYALGPYQISAPQLPAYNGQTVGTFYYVN  
DAGGLESKV FSSGSGGS TNLSDIIEKETGKQLVIQESILMLPEEVEEVIGNKPESDILVHTA  
YDESTDENVM LLTSDAPEYKPWALVIQDSNGENKIKMLRSGQCTNYALLKLAGDVESNPG/  
E2A\_cleavage\_site/PGGGVSKGEELIKENMHMKLYMEGTVNNHHFKCTSEGEKPYEGTQ  
TMRIKVV EGGPLPFAFDILATSFMYGSRTFINHTQGIPDFFKQSFPEGFTWERVTTYEDGGV  
LTATQDTS LQDGCLIYNVKIRGVNFPSNGPVMQKKT LGWEANTEMLYPADGGLEGRSDMA  
LKL VGGGHLICNFKTTYRSKKPAK NLKMPGVVYVDHRLERIKEADKETYVEQHEVAVARYC  
DLPSKLGHKLNLNPPDES GPGCMSCKCVLS\*

**DdCBE (H) - Nd3-9577 - G1333-C:**

MLSRVCGTSRQLAPVLGGLGSRQKHSLPAGYPYDVPDYAGYPYDVPDYAGYPYDVPDY  
AIHGVP MVDLRTLGYSSQQQEKIKPKV RSTVAQHHEALVGHGFTHAHIVALSQHPAALGTV  
AVKYQDMIAALPEATHEAIVGVGKQWSGARALEALLTVAGELRGPPGTLDTGQLLKIARKG  
GVTAVEAVHAWRNALTGAPLNLTP EQVVAIASNNGGKQALETVQRLLPVLCQAHGLTPEQ  
VVAIASHDGGKQALETVQRLLPVLCQAHGLTPAQVVAIASNIGGKQALETVQRLLPVLCQAH  
GLTPDQVVAIASNNGGKQALETVQRLLPVLCQAHGLTPEQVVAIASNIGGKQALETVQRLLP  
VLCQAHGLTPDQVVAIASNNGGKQALETVQRLLPVLCQAHGLTPEQVVAIASHDGGKQALE  
TVQRLLPVLCQAHGLTPAQVVAIASNIGGKQALETVQRLLPVLCQAHGLTPEQVVAIASNG  
GGKQALETVQRLLPVLCQAHGLTPEQVVAIASNNGGKQALETVQRLLPVLCQAHGLTPEQ  
VVAIASNNGGKQALETVQRLLPVLCQAHGLTPEQVVAIASNIGGKQALETVQRLLPVLCQAH  
GLTPDQVVAIASNNGGKQALETVQRLLPVLCQAHGLTPEQVVAIASNNGGKQALETVQRLL  
PVLCQAHGLTPEQVVAIASNNGRPALESIVAQLSRPDPALAALNDHLVALACLGGRPALD  
AVKKGLPHAPALIKRTNRRIPERTSHRVAGSPTYPNYANAGHVEGQSALFMRDNGISEGL  
VFHNNPEGTCGFCVNM TETLLPENAKMTVVPPEGAIPVKRGATGETKVFTGNSNSPKSPT  
KGGCSGGS TNLSDIIEKETGKQLVIQESILMLPEEVEEVIGNKPESDILVHTAYDESTDENVM  
LLTSDAPEYKPWALVIQDSNGENKIKMLRSGQCTNYALLKLAGDVESNPG/E2A\_cleavage\_  
site/PGGGVSKGEELIKENMHMKLYMEGTVNNHHFKCTSEGEKPYEGTQTMRIKVV EGGP  
LPFAFDILATSFMYGSRTFINHTQGIPDFFKQSFPEGFTWERVTTYEDGGVLTATQDTS LQD  
GCLIYNVKIRGVNFPSNGPVMQKKT LGWEANTEMLYPADGGLEGRSDMALKLVGGGHLIC  
NFKTTYRSKKPAK NLKMPGVVYVDHRLERIKEADKETYVEQHEVAVARYCDLPSKLGHKLNLN  
PPDES GPGCMSCKCVLS\*

**DdCBE (H) - Nd3-9577 - G1337-N:**

MLSRVAVCGTSRQLAPVLGYLGSRQKHSLPAGYPYDVPDYAGYPYDVPDYAGYPYDVPDY  
AIHGVPMDLRTLGLYSQQQQEKIKPKVRSSTVAQHHEALVGHGFTHAHIVALSQHPAALGTV  
AVKYQDMIAALPEATHEAIVGVGKQWVGARALEALLTVAGELRGPPGTLDTGQLLKIARKG  
GVTAVEAVHAWRNALTGAPLNLTPAQVVAIASNNGGKQALETVQRLLPVLCQAHGLTPEQ  
VVAIASHDGGKQALETVQRLLPVLCQAHGLTPAQVVAIASNIGGKQALETVQRLLPVLCQAH  
GLTPDQVVAIASNNGGKQALETVQRLLPVLCQAHGLTPEQVVAIASNIGGKQALETVQRLLP  
VLCQAHGLTPDQVVAIASNNGGKQALETVQRLLPVLCQAHGLTPEQVVAIASHDGGKQALE  
TVQRLLPVLCQAHGLTPAQVVAIASNIGGKQALETVQRLLPVLCQAHGLTPEQVVAIASNG  
GGKQALETVQRLLPVLCQAHGLTPEQVVAIASNNGGKQALETVQRLLPVLCQAHGLTPEQV  
VAIASNIGGKQALETVQRLLPVLCQAHGLTPEQVVAIASNIGGKQALETVQRLLPVLCQAH  
GLTPDQVVAIASNNGGKQALETVQRLLPVLCQAHGLTPEQVVAIASNNGGKQALETVQRLL  
PVLCQAHGLTPEQVVAIASNNGRPALESIVAQLSRPDPALAALTNHDLVALACLGGRPALD  
AVKKGLPHAPALIKRTNRRIPERTSHRVAAGSGSYALGPYQISAPQLPAYNGQTVGTFYVYN  
DAGGLESKVFSSGGPTYPNYANAGHVEGQSALFMRDNGISEGLVFHNNPEGTGFCFVN  
MTETLLPENAKMTVVPPEGSSGSTNLSDIIEKETGKQLVIQESILMLPEEVEEVIGNKPESDIL  
VHTAYDESTDENVMMLTSDAPEYKPWALVIQDSNGENKIKMLRSGQCTNYALLKLAGDVES  
NPG/E2A\_cleavage\_site/PGGGVSKGEELIKENMHMKLYMEGTVNNHHFKCTSEGEKPYE  
GTQTMRIKVVVEGGPLPFAFDILATSFMYGSRTFINHTQGIPDFFKQSFPEGFTWERVTTYED  
GGVLTATQDTSLQDGCLINVKIRGVNFPSNGPVMQKKTGWEANTEMLYPADGGLEGRS  
DMALKLVGGGHLCNFKTTYRSKKPAKNLKMVGYYVDHRLERIKEADKETYVEQHEVAVA  
RYCDLPSKLGHKLNLNPPDESGPGCMSCKCVLS\*

**DdCBE (H) - Nd3-9577 - G1337-C:**

MLSRVAVCGTSRQLAPVLGYLGSRQKHSLPAGYPYDVPDYAGYPYDVPDYAGYPYDVPDY  
AIHGVPMDLRTLGLYSQQQQEKIKPKVRSSTVAQHHEALVGHGFTHAHIVALSQHPAALGTV  
AVKYQDMIAALPEATHEAIVGVGKQWVGARALEALLTVAGELRGPPGTLDTGQLLKIARKG  
GVTAVEAVHAWRNALTGAPLNLTPAQVVAIASNNGGKQALETVQRLLPVLCQAHGLTPEQ  
VVAIASHDGGKQALETVQRLLPVLCQAHGLTPAQVVAIASNIGGKQALETVQRLLPVLCQAH  
GLTPDQVVAIASNNGGKQALETVQRLLPVLCQAHGLTPEQVVAIASNIGGKQALETVQRLLP  
VLCQAHGLTPDQVVAIASNNGGKQALETVQRLLPVLCQAHGLTPEQVVAIASHDGGKQALE  
TVQRLLPVLCQAHGLTPAQVVAIASNIGGKQALETVQRLLPVLCQAHGLTPEQVVAIASNG  
GGKQALETVQRLLPVLCQAHGLTPEQVVAIASNNGGKQALETVQRLLPVLCQAHGLTPEQV  
VAIASNIGGKQALETVQRLLPVLCQAHGLTPEQVVAIASNIGGKQALETVQRLLPVLCQAH  
GLTPDQVVAIASNNGGKQALETVQRLLPVLCQAHGLTPEQVVAIASNNGGKQALETVQRLL  
PVLCQAHGLTPEQVVAIASNNGRPALESIVAQLSRPDPALAALTNHDLVALACLGGRPALD  
AVKKGLPHAPALIKRTNRRIPERTSHRVAAGSAIPVKRGATGETKVFTGNSNSPKSPTKGGC  
SGGSTNLSDIIEKETGKQLVIQESILMLPEEVEEVIGNKPESDILVHTAYDESTDENVMMLTSD  
APEYKPWALVIQDSNGENKIKMLRSGQCTNYALLKLAGDVESNPG/E2A\_cleavage\_site/PG  
GGVSKGEELIKENMHMKLYMEGTVNNHHFKCTSEGEKPYEGTQTMRIKVVVEGGPLPFAF  
DILATSFMYGSRTFINHTQGIPDFFKQSFPEGFTWERVTTYEDGGVLTATQDTSLQDGCLIN  
VKIRGVNFPSNGPVMQKKTGWEANTEMLYPADGGLEGRSDMALKLVGGGHLCNFKTT  
YRSKKPAKNLKMVGYYVDHRLERIKEADKETYVEQHEVAVARYCDLPSKLGHKLNLNPP  
DESGPGCMSCKCVLS\*

## Supplementary Sequences 2 | Amino acid sequences of DdCBEs-Nd3-9577 used in the AAV experiments.

The halves used to target the L-strand - DdCBE (L) – in the AAV experiments are similar to the cell screen, except that the T2A self-cleavage peptide and the fluorescent marker GFP were substituted by a stop codon at the end of UGI, resulting in the architecture of (from N- to C-terminus):

SOD2 MTS – 3xHA – TALE – 2aa linker – DddA<sub>tox</sub> G1333-C – 4aa linker – UGI\*

### Targeting: 5'-TCAGAAAAGCAAATC-3'

#### AAV- DdCBE (L) - Nd3-9577 - G1333-C:

MLSRVCGTSRQLAPVVLGYSRQKHSLPAGYPYDVPDYAGYPYDVPDYAGYPYDVPDY  
AIHGVPMDLRTLGYSSQQQEKIKPKVRSVAQHHEALVGHGFTHAHIVALSQHPAALGTV  
AVKYQDMIAALPEATHEAIVGVGKQWSGARALEALLTVAGELRGPPGTLDTGQLLKIARKG  
GVTAVEAVHAWRNALTGAPLNLTPQVVAIASHDGGKQALETVQRLLPVLCQAHGLTPAQ  
VVAIASNIGGKQALETVQRLLPVLCQAHGLTPDQVVAIASNNGGKQALETVQRLLPVLCQAH  
GLTPEQVVAIASNIGGKQALETVQRLLPVLCQAHGLTPDQVVAIASNIGGKQALETVQRLLP  
VLCQAHGLTPDQVVAIASNIGGKQALETVQRLLPVLCQAHGLTPDQVVAIASNIGGKQALET  
VQRLLPVLCQAHGLTPDQVVAIASNIGGKQALETVQRLLPVLCQAHGLTPDQVVAIASNNG  
GKQALETVQRLLPVLCQAHGLTPEQVVAIASHDGGKQALETVQRLLPVLCQAHGLTPAQV  
VAIASNIGGKQALETVQRLLPVLCQAHGLTPDQVVAIASNIGGKQALETVQRLLPVLCQAHGL  
TPDQVVAIASNIGGKQALETVQRLLPVLCQAHGLTPDQVVAIASNNGGKQALETVQRLLPV  
CQAHGLTPEQVVAIASHDGGRPALESIVAQLSRPDPALAAALNDHLVALACLGGRPALDAV  
KKGLPHAPALIKRTNRRIPERTSHRVAGSPTYPNYANAGHVEGQSALFMRDNGISEGLVF  
HNNPEGTGCFVNMTELLPENAKMTVVPPEGAIPVKRGATGETKVFTGNSNSPKSPTKG  
GCSGGS<sup>TNLS</sup>SDIIEKETGKQLVIQESILMLPEEVEEVIGNKPESDILVHTAYDESTDENVMLLT  
SDAPEYKPWALVIQDSNGENKIKML\*

The halves used to target the H-strand - DdCBE (H) – in the AAV experiments are similar to the cell screen, except that the E2A self-cleavage peptide and the fluorescent marker RFP were substituted by a stop codon at the end of UGI and the 3xHA tag substituted by a 3xFLAG tag, resulting in the architecture of (from N- to C-terminus):

SOD2 MTS – 3xFLAG – TALE – 2aa linker – DddA<sub>tox</sub> G1333-N – 4aa linker – UGI\*

### Targeting: 5'-TGCAGAGCTTGTAGG-3'

#### AAV- DdCBE (H) - Nd3-9577 - G1333-N:

MLSRVCGTSRQLAPVVLGYSRQKHSLPAGDYKDHGDYKDHIDYKDDDDKIHGVPMDL  
DLRTLGYSSQQQEKIKPKVRSVAQHHEALVGHGFTHAHIVALSQHPAALGTVAVKYQDMI  
AALPEATHEAIVGVGKQWSGARALEALLTVAGELRGPPGTLDTGQLLKIARKGGVTAVEAV  
HAWRNALTGAPLNLTPQVVAIASNNGGKQALETVQRLLPVLCQAHGLTPEQVVAIASHDG  
GKQALETVQRLLPVLCQAHGLTPAQVVAIASNIGGKQALETVQRLLPVLCQAHGLTPDQV

AIASNNGGKQALETVQRLLPVLCQAHGLTPEQVVAIASNIGGKQALETVQRLLPVLCQAHGL  
TPDQVVAIASNNGGKQALETVQRLLPVLCQAHGLTPEQVVAIASHDGGKQALETVQRLLPV  
LCQAHGLTPAQVVAIASNNGGKQALETVQRLLPVLCQAHGLTPEQVVAIASNNGGKQALET  
VQRLLPVLCQAHGLTPEQVVAIASNNGGKQALETVQRLLPVLCQAHGLTPEQVVAIASNGG  
GKQALETVQRLLPVLCQAHGLTPEQVVAIASNIGGKQALETVQRLLPVLCQAHGLTPDQVV  
AIASNNGGKQALETVQRLLPVLCQAHGLTPEQVVAIASNNGGKQALETVQRLLPVLCQAHG  
LTPEQVVAIASNNGGRPALESIVAQLSRPDPALAALTNDHLVALACLGGRPALDAVKKGLPH  
APALIKRTNRRIPERTSHRVAGSGSYALGPYQISAPQLPAYNGQTVGTFYYVNDAGGLESK  
VFSSGSGGSTNLSDIIEKETGKQLVIQESILMLPEEVVEEVIGNKPESDILVHTAYDESTDEN  
VMLLTSDAPEYKPWALVIQDSNGENKIKML\*
